# Supplementary material for: Mixing alters the lytic activity of viruses in the dark ocean
Source: PubMed Central journal article supplement (PMC5905300; doi:10.1002/ecy.2135), 2018-02-06
Supplement: ECY-99-700-s001.pdf [file ECY-99-700-s001.pdf]

# Mixing alters the lytic activity of viruses in the dark ocean

Christian Winter, Nicole Köstner, Carl-Philip Kruspe, Damaris Urban, Simone Muck, Thomas

Reinthalder, Gerhard J. Herndl

## Appendix S1

**Table S1:** Variation partitioning of the frequency of infected cells (FIC)

**Table S2:** Variation partitioning of viral production (VP)

**Table S3:** Variation partitioning of differences in co-occurrence patterns of prokaryotes with viruses explained by *in situ* biological and water mass-defining parameters

**Table S4:** Variation partitioning of differences in co-occurrence patterns of prokaryotes with viruses explained by the frequency of infected cells and water mass-defining parameters as co-variables

**Table S5:** Variation partitioning of differences in co-occurrence patterns of prokaryotes with viruses explained by viral production and water mass-defining parameters as co-variables

**Table S1:** Variation partitioning of the frequency of infected cells (FIC). The table gives the percentage of the variation in FIC relative to controls that is explained by *in situ* biological and water mass-defining parameters. Data for single source transplantation and mixing treatments were analyzed together. The matrix of biological parameters consisted of prokaryotic leucine incorporation, prokaryotic and viral abundance. Temperature and salinity were used as co-variables representing water masses. Data are presented after 32 h and 72 h of incubation and throughout the entire incubation period. The results are assumed to be significant at  $p \leq 0.05$  (n.a.: not applicable).

| Parameters                                           | 32 h     |          | 72 h     |          | All      |          |
|------------------------------------------------------|----------|----------|----------|----------|----------|----------|
|                                                      | Fraction | <i>p</i> | Fraction | <i>p</i> | Fraction | <i>p</i> |
| Biological parameters and water masses               | 75       | <0.0001  | 86       | <0.0001  | 80       | <0.0001  |
| Biological parameters not corrected for water masses | 68       | <0.0001  | 82       | <0.0001  | 75       | <0.0001  |
| Water masses not corrected for biological parameters | 28       | 0.0925   | 33       | 0.0923   | 31       | 0.0940   |
| Biological parameters                                | 46       | 0.0072   | 53       | 0.0014   | 49       | 0.0038   |
| Water mass-correlated biological parameters          | 22       | n.a.     | 29       | n.a.     | 26       | n.a.     |
| Water masses                                         | 6        | 0.2008   | 4        | 0.1881   | 5        | 0.1957   |
| Unexplained                                          | 25       | n.a.     | 14       | n.a.     | 20       | n.a.     |

**Table S2:** Variation partitioning of viral production (VP). The table gives the percentage of the variation in VP relative to controls that is explained by *in situ* biological and water mass-defining parameters. Data for single source transplantation and mixing treatments were analyzed together. The matrix of biological parameters consisted of prokaryotic leucine incorporation, prokaryotic and viral abundance. Temperature and salinity were used as co-variables representing water masses. Data are presented after 32 h and 72 h of incubation and throughout the entire incubation period. The results are assumed to be significant at  $p \leq 0.05$  (n.a.: not applicable).

| Parameters                                           | 32 h     |          | 72 h     |          | All      |          |
|------------------------------------------------------|----------|----------|----------|----------|----------|----------|
|                                                      | Fraction | <i>p</i> | Fraction | <i>p</i> | Fraction | <i>p</i> |
| Biological parameters and water masses               | 70       | 0.0002   | 90       | 0.0001   | 81       | <0.0001  |
| Biological parameters not corrected for water masses | 60       | 0.0027   | 85       | 0.0001   | 73       | <0.0001  |
| Water masses not corrected for biological parameters | 26       | 0.1009   | 23       | 0.1166   | 24       | 0.1190   |
| Biological parameters                                | 44       | 0.0504   | 67       | 0.0007   | 57       | 0.0054   |
| Water mass-correlated biological parameters          | 16       | n.a.     | 18       | n.a.     | 16       | n.a.     |
| Water masses                                         | 10       | 0.1649   | 5        | 0.1421   | 8        | 0.1615   |
| Unexplained                                          | 30       | n.a.     | 10       | n.a.     | 19       | n.a.     |

**Table S3:** Variation partitioning of differences in co-occurrence patterns of prokaryotes with viruses. The table gives the percentage of the variation in graph link efficiency of networks based on co-occurrence patterns of prokaryotes with viruses relative to controls that is explained by *in situ* biological and water mass-defining parameters. Data for single source transplantation and mixing treatments were analyzed together. The matrix of biological parameters consisted of prokaryotic leucine incorporation, prokaryotic and viral abundance. Temperature and salinity were used as co-variables representing water masses. Data are presented after 24 h, 48 h, 72 h of incubation, and throughout the entire incubation period. The results are assumed to be significant at  $p \leq 0.05$  (n.a.: not applicable).

| Parameters                                           | 24 h     |          | 48 h     |          | 72 h     |          | All      |          |
|------------------------------------------------------|----------|----------|----------|----------|----------|----------|----------|----------|
|                                                      | Fraction | <i>p</i> | Fraction | <i>p</i> | Fraction | <i>p</i> | Fraction | <i>p</i> |
| Biological parameters and water masses               | 38       | 0.2101   | 24       | 0.5463   | 38       | 0.1473   | 34       | 0.2918   |
| Biological parameters not corrected for water masses | 23       | 0.2321   | 12       | 0.6291   | 35       | 0.0297   | 21       | 0.2812   |
| Water masses not corrected for biological parameters | 32       | 0.0222   | 7        | 0.6531   | 13       | 0.2997   | 18       | 0.1362   |
| Biological parameters                                | 6        | 0.7721   | 17       | 0.4030   | 25       | 0.1889   | 16       | 0.4271   |
| Water mass-correlated biological parameters          | 17       | n.a.     | -5       | n.a.     | 10       | n.a.     | 5        | n.a.     |
| Water masses                                         | 15       | 0.2597   | 12       | 0.3721   | 3        | 0.5606   | 13       | 0.3287   |
| Unexplained                                          | 62       | n.a.     | 76       | n.a.     | 62       | n.a.     | 66       | n.a.     |

**Table S4:** Variation partitioning of differences in co-occurrence patterns of prokaryotes with viruses. The table gives the percentage of the variation in graph link efficiency of networks based on co-occurrence patterns of prokaryotes with viruses relative to controls that is explained by the variation in the frequency of infected cells (FIC) throughout the entire incubation period as explanatory variable and temperature and salinity as co-variables representing water masses. Data for single source transplantation and mixing treatments were analyzed together. Data are presented after 24 h, 48 h, 72 h of incubation, and throughout the entire incubation period. The results are assumed to be significant at  $p \leq 0.05$  (n.a.: not applicable).

| Parameters                         | 24 h     |          | 48 h     |          | 72 h     |          | All      |          |
|------------------------------------|----------|----------|----------|----------|----------|----------|----------|----------|
|                                    | Fraction | <i>p</i> | Fraction | <i>p</i> | Fraction | <i>p</i> | Fraction | <i>p</i> |
| FIC and water masses               | 68       | 0.2418   | 60       | 0.2334   | 70       | 0.0373   | 69       | 0.1071   |
| FIC not corrected for water masses | 54       | 0.2651   | 50       | 0.2122   | 65       | 0.0091   | 58       | 0.0875   |
| Water masses not corrected for FIC | 32       | 0.0201   | 7        | 0.6481   | 13       | 0.3019   | 17       | 0.1356   |
| FIC                                | 35       | 0.5118   | 53       | 0.1973   | 57       | 0.0648   | 52       | 0.1049   |
| FIC correlated with water masses   | 18       | n.a.     | -3       | n.a.     | 8        | n.a.     | 6        | n.a.     |
| Water masses                       | 14       | 0.2175   | 10       | 0.3662   | 5        | 0.5476   | 11       | 0.2410   |
| Unexplained                        | 32       | n.a.     | 40       | n.a.     | 30       | n.a.     | 31       | n.a.     |

**Table S5:** Variation partitioning of differences in co-occurrence patterns of prokaryotes with viruses. The table gives the percentage of the variation in graph link efficiency of networks based on co-occurrence patterns of prokaryotes with viruses relative to controls that is explained by the variation in viral production (VP) throughout the entire incubation period as explanatory variable and temperature and salinity as co-variables representing water masses. Data for single source transplantation and mixing treatments were analyzed together. Data are presented after 24 h, 48 h, 72 h of incubation, and throughout the entire incubation period. The results are assumed to be significant at  $p \leq 0.05$  (n.a.: not applicable).

| Parameters                        | 24 h     |          | 48 h     |          | 72 h     |          | All      |          |
|-----------------------------------|----------|----------|----------|----------|----------|----------|----------|----------|
|                                   | Fraction | <i>p</i> | Fraction | <i>p</i> | Fraction | <i>p</i> | Fraction | <i>p</i> |
| VP and water masses               | 55       | 0.6029   | 57       | 0.3280   | 67       | 0.0815   | 60       | 0.4105   |
| VP not corrected for water masses | 36       | 0.7974   | 51       | 0.1739   | 62       | 0.0199   | 50       | 0.3385   |
| Water masses not corrected for VP | 32       | 0.0242   | 7        | 0.6677   | 13       | 0.3025   | 18       | 0.1417   |
| VP                                | 23       | 0.9331   | 50       | 0.2726   | 54       | 0.1392   | 42       | 0.5191   |
| VP correlated with water masses   | 14       | n.a.     | 1        | n.a.     | 8        | n.a.     | 8        | n.a.     |
| Water masses                      | 18       | 0.2495   | 6        | 0.6479   | 5        | 0.6246   | 10       | 0.5451   |
| Unexplained                       | 45       | n.a.     | 43       | n.a.     | 33       | n.a.     | 40       | n.a.     |
