# Supplementary material for: Mixing alters the lytic activity of viruses in the dark ocean
Source: PubMed Central journal article supplement (PMC5905300; doi:10.1002/ecy.2135), 2018-02-06
Supplement: ECY-99-700-s003.pdf [file ECY-99-700-s003.pdf]

# Mixing alters the lytic activity of viruses in the dark ocean

Christian Winter, Nicole Köstner, Carl-Philip Kruspe, Damaris Urban, Simone Muck, Thomas

Reinthalder, Gerhard J. Herndl

## Appendix S3

**Figure S1:** Temporal development of viral abundance in virus dilution incubations

**Equation 1:** Frequency of infected cells (FIC)

**Equation 2:** Viral production (VP)

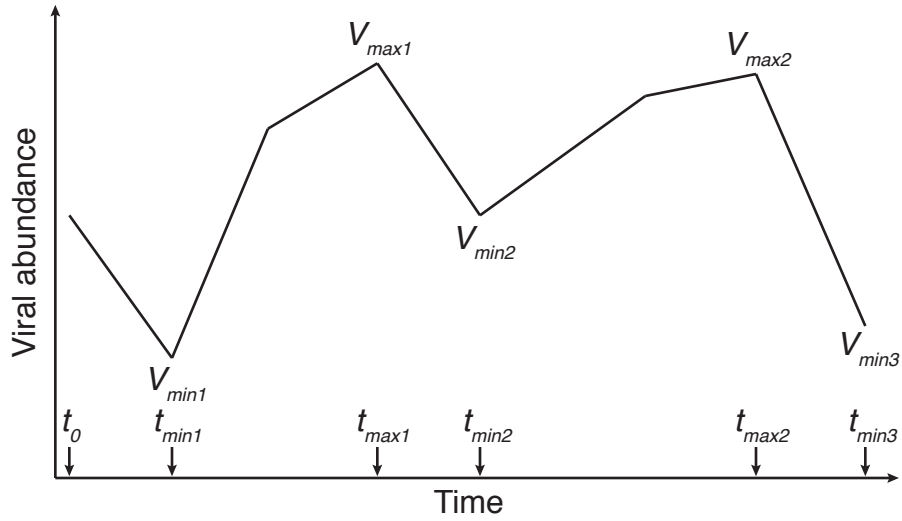

**Figure S1:** Temporal development of viral abundance in virus dilution incubations. The sketch depicts a typical example of the temporal development of viral abundance commonly obtained from virus dilution incubations. Additionally, the figure depicts local maxima ( $V_{max1}$ ,  $V_{max2}$ ) and minima ( $V_{min1}$ ,  $V_{min2}$ ,  $V_{min3}$ ) of viral abundance and the corresponding time points ( $t_{min1}$ ,  $t_{max1}$ ,  $t_{min2}$ ,  $t_{max2}$ ,  $t_{min3}$ ) that are used to calculate the frequency of infected cells (FIC, Eq. S1) and viral production (VP, Eq. S2); start of the incubation:  $t_0$ .

$$\text{Equation S1: FIC} = \frac{[(V_{max1} - V_{min1}) + (V_{max2} - V_{min2})]}{\text{burst size}} \times \frac{100}{\text{prokaryotic abundance at } t_0}$$

$$\text{Equation S2: VP} = \frac{[(V_{max1} - V_{min1}) + (V_{max2} - V_{min2})]}{(t_{max2} - t_{min1})}$$

The number of maxima and minima in the temporal development of viral abundance may vary so that the equations will have to be adapted accordingly.
